# Supplementary material for: A One Health Comparative Assessment of Antimicrobial Resistance in Generic and Extended-Spectrum Cephalosporin-Resistant Escherichia coli from Beef Production, Sewage and Clinical Settings
Source: PubMed Central journal article supplement (PMC7355928; doi:10.3390/microorganisms8060885), 2020-06-11
Supplement: microorganisms-08-00885-s001.pdf [file microorganisms-08-00885-s001.pdf]

## SUPPLEMENTARY TABLES AND FIGURES

**Table S1a.** Evaluation of differences in oxytetracycline resistance occurring among extended-spectrum cephalosporin resistant *E. coli* originating from multiple segments of the One Health continuum

| Sample | Variable | Odds ratio | 95% CI       | P-value |
|--------|----------|------------|--------------|---------|
| CB     | CF       | 0.95       | 5.37 - 73.91 | <.0001  |
| CB     | HM       | 0.19       | 0.09 - 0.6   | 0.01    |
| CB     | SS       | 0.23       | 0.11 - 0.85  | 0.11    |
| CF     | HM       | 0.01       | 0.003 - 0.05 | <.0001  |
| CF     | SS       | 0.01       | 0.004 - 0.06 | <.0001  |
| HM     | SS       | 0.56       | 0.50 - 3.18  | 0.96    |

Multiple pairwise comparisons identified significant differences associated with each antibiotic resistance occurring within the various segments. CF – cattle feces (n = 382); CB – catch basin (n=137); SS – surrounding streams (n = 59); HM – clinical humans (n = 25) and municipal sewage treatment (n = 98) and BP\*\* – beef processing plant (n = 4 \*\*not included in this analyses) isolates.

**Table S1b.** Evaluation of differences in ampicillin resistance occurring among extended-spectrum cephalosporin resistant *E. coli* originating from multiple segments of the One Health continuum

| Sample | Variable | Odds ratio | 95% CI         | P-value |
|--------|----------|------------|----------------|---------|
| CB     | CF       | 0.99       | 22.19 - 388.89 | <.0001  |
| CB     | HM       | 1.0        | 38 - >999.999  | <.0001  |
| CB     | SS       | 0.46       | 0.32 - 2.19    | 0.98    |
| CF     | HM       | 0.84       | 0.59 - 47.76   | 0.41    |
| CF     | SS       | 0.01       | 0.002 - 0.04   | <.0001  |
| HM     | SS       | 0.002      | <0.001 - 0.02  | <.0001  |

**Table S1c.** Evaluation of differences in streptomycin resistance occurring among extended-spectrum cephalosporin resistant *E. coli* originating from multiple segments of the One Health continuum

| Sample | Variable | Odds ratio | 95% CI       | P-value |
|--------|----------|------------|--------------|---------|
| CB     | CF       | 0.91       | 4.13 - 24.20 | <.0001  |
| CB     | HM       | 0.47       | 0.43 - 1.74  | 0.98    |
| CB     | SS       | 0.39       | 0.30 - 1.43  | 0.69    |
| CF     | HM       | 0.08       | 0.04 - 0.19  | <.0001  |
| CF     | SS       | 0.06       | 0.03 - 0.17  | <.0001  |
| HM     | SS       | 0.43       | 0.34 - 1.64  | 0.88    |

**Table S1d.** Evaluation of differences in amoxicillin/clavulanate resistance occurring among extended-spectrum cephalosporin resistant *E. coli* originating from multiple segments of the One Health continuum

| Sample | Variable | Odds ratio | 95% CI       | P-value |
|--------|----------|------------|--------------|---------|
| CB     | CF       | 0.93       | 5.21 - 30.35 | <.0001  |
| CB     | HM       | 0.73       | 1.24 - 5.92  | 0.06    |
| CB     | SS       | 0.31       | 0.19 - 1.04  | 0.22    |
| CF     | HM       | 0.18       | 0.11 - 0.41  | <.0001  |
| CF     | SS       | 0.03       | 0.01 - 0.11  | <.0001  |
| HM     | SS       | 0.14       | 0.06 - 0.44  | 0.002   |

**Table S1e.** Evaluation of differences in ceftiofur resistance occurring among extended-spectrum cephalosporin resistant *E. coli* originating from multiple segments of the One Health continuum

| Sample | Variable | Odds ratio | 95% CI         | P-value |
|--------|----------|------------|----------------|---------|
| CB     | CF       | 0.99       | 11.98 - 635.19 | <.0001  |
| CB     | HM       | 1.00       | 46.4 - >999.99 | <.0001  |
| CB     | SS       | 0.53       | 0.35 - 3.54    | 1.00    |
| CF     | HM       | 0.89       | 2.24 - 31.57   | 0.01    |
| CF     | SS       | 0.01       | 0.002 - 0.09   | <.0001  |
| HM     | SS       | 0.002      | <0.001 - 0.02  | <.0001  |

\*\*Ceftiofur was not modeled in generic *E. coli* due to low resistance prevalence and consequent inability for the model to converge. Therefore, ceftazidime is not presented.

**Table S1f.** Evaluation of differences in ceftazidime resistance occurring among extended-spectrum cephalosporin resistant *E. coli* originating from multiple segments of the One Health continuum

| Sample | Variable | Odds ratio | 95% CI       | P-value |
|--------|----------|------------|--------------|---------|
| CB     | CF       | 0.96       | 8.05 - 81.98 | <.0001  |
| CB     | HM       | 0.86       | 2.26 - 16.44 | 0.002   |
| CB     | SS       | 0.40       | 0.27 - 1.58  | 0.77    |
| CF     | HM       | 0.19       | 0.12 - 0.49  | 0.0005  |
| CF     | SS       | 0.02       | 0.01 - 0.1   | <.0001  |
| HM     | SS       | 0.10       | 0.03 - 0.34  | 0.0008  |

\*\*Ceftazidime was not modeled in generic *E. coli* due to low resistance prevalence and consequent inability for the model to converge

**Table S1g.** Evaluation of differences in sulfisoxazole resistance occurring among extended-spectrum cephalosporin resistant *E. coli* originating from multiple segments of the One Health continuum

| Sample | Variable | Odds ratio | 95% CI       | P-value |
|--------|----------|------------|--------------|---------|
| CB     | CF       | 0.95       | 6.89 - 52.82 | <.0001  |
| CB     | HM       | 0.66       | 0.90 - 4.05  | 0.32    |
| CB     | SS       | 0.52       | 0.49 - 2.45  | 1.00    |
| CF     | HM       | 0.09       | 0.043 - 0.23 | <.0001  |
| CF     | SS       | 0.05       | 0.02 - 0.16  | <.0001  |
| HM     | SS       | 0.37       | 0.25 - 1.32  | 0.54    |

**Table S1h.** Evaluation of differences in florfenicol resistance occurring among extended-spectrum cephalosporin resistant *E. coli* originating from multiple segments of the One Health continuum

| Sample | Variable | Odds ratio | 95% CI       | P-value |
|--------|----------|------------|--------------|---------|
| CB     | CF       | 0.88       | 3.16 - 16.24 | <.0001  |
| CB     | HM       | 0.09       | 0.04 - 0.29  | 0.0002  |
| CB     | SS       | 0.35       | 0.24 - 1.20  | 0.42    |
| CF     | HM       | 0.01       | 0.004 - 0.05 | <.0001  |
| CF     | SS       | 0.07       | 0.03 - 0.22  | <.0001  |
| HM     | SS       | 0.84       | 1.96 - 14.10 | 0.006   |

**Table S1i.** Evaluation of differences in trimethoprim-sulfamethoxazole resistance occurring among extended-spectrum cephalosporin resistant *E. coli* originating from multiple segments of the One Health continuum

| Sample | Variable | Odds ratio | 95% CI       | P-value |
|--------|----------|------------|--------------|---------|
| CB     | CF       | 0.87       | 2.99 - 14.28 | <.0001  |
| CB     | HM       | 0.84       | 2.17 - 11.88 | 0.001   |
| CB     | SS       | 0.48       | 0.41 - 2.15  | 0.1     |
| CF     | HM       | 0.44       | 0.46 - 1.31  | 0.77    |
| CF     | SS       | 0.13       | 0.06 - 0.35  | 0.0002  |
| HM     | SS       | 0.16       | 0.072 - 0.48 | 0.003   |

\*\*Trimethoprim/sulfamethoxazole was not modeled for generic *E. coli* due to low resistance prevalence and consequent inability for the model to converge.

**Table S1j.** Evaluation of differences in oxytetracycline resistance occurring among generic *E. coli* originating from multiple segments of the One Health continuum

| Sample | Variable | Odds ratio | 95% CI         | P-value |
|--------|----------|------------|----------------|---------|
| CB     | CF       | 0.93       | 5.75 - 28.67   | <.0001  |
| CB     | BP       | 0.97       | 11.72 - 122.98 | <.0001  |
| CB     | MS       | 0.35       | 0.26 - 1.14    | 0.43    |
| CB     | SS       | 0.79       | 1.82 - 7.59    | 0.004   |
| CF     | BP       | 0.75       | 1.44 - 6.08    | 0.03    |
| CF     | MS       | 0.04       | 0.02 - 0.12    | <.0001  |
| CF     | SS       | 0.22       | 0.16 - 0.53    | 0.001   |
| BP     | MS       | 0.01       | 0.004 - 0.06   | <.0001  |
| BP     | SS       | 0.09       | 0.04 - 0.24    | <.0001  |
| MS     | SS       | 0.87       | 2.74 - 17.21   | 0.001   |

In the generic *E. coli* sub-population, MS isolates served as human-sourced isolates for statistical analyses. CF – cattle feces (n = 142); CB – catch basin (n=185); SS – surrounding streams (n = 81); municipal sewage treatment (n = 96) and BP – beef processing plant (n = 159).

**Table S1k.** Evaluation of differences in ampicillin resistance occurring among generic *E. coli* originating from multiple segments of the One Health continuum

| Sample | Variable | Odds ratio | 95% CI      | P-value |
|--------|----------|------------|-------------|---------|
| CB     | CF       | 0.16       | 0.09 - 0.37 | <.0001  |
| CB     | BP       | 0.13       | 0.07 - 0.32 | <.0001  |
| CB     | MS       | 0.24       | 0.16 - 0.67 | 0.01    |
| CB     | SS       | 0.08       | 0.03 - 0.24 | <.0001  |
| CF     | BP       | 0.45       | 0.43 - 1.59 | 0.98    |
| CF     | MS       | 0.64       | 0.88 - 3.45 | 0.47    |
| CF     | SS       | 0.32       | 0.2 - 1.17  | 0.46    |
| BP     | MS       | 0.68       | 1.03 - 4.35 | 0.23    |
| BP     | SS       | 0.37       | 0.23 - 1.47 | 0.76    |
| MS     | SS       | 0.22       | 0.11 - 0.71 | 0.06    |

**Table S1l.** Evaluation of differences in amoxicillin/clavulanate resistance occurring among generic *E. coli* originating from multiple segments of the One Health continuum

| Sample | Variable | Odds ratio | 95% CI       | P-value |
|--------|----------|------------|--------------|---------|
| CB     | CF       | 0.08       | 0.03 - 0.31  | 0.001   |
| CB     | BP       | 0.10       | 0.04 - 0.38  | 0.004   |
| CB     | MS       | 0.19       | 0.08 - 0.71  | 0.08    |
| CB     | SS       | 0.03       | 0.004 - 0.31 | 0.02    |

|    |    |      |             |      |
|----|----|------|-------------|------|
| CF | BP | 0.57 | 0.4 - 4.57  | 0.99 |
| CF | MS | 0.73 | 0.84 - 8.73 | 0.44 |
| CF | SS | 0.28 | 0.04 - 3.51 | 0.91 |
| BP | MS | 0.67 | 0.63 - 6.42 | 0.75 |
| BP | SS | 0.22 | 0.03 - 2.61 | 0.79 |
| MS | SS | 0.12 | 0.02 - 1.26 | 0.39 |

**Table S1m.** Evaluation of differences in streptomycin resistance occurring among generic *E. coli* originating from multiple segments of the One Health continuum

| Sample | Variable | Odds ratio | 95% CI       | P-value |
|--------|----------|------------|--------------|---------|
| CB     | CF       | 0.81       | 2.10 - 8.87  | 0.00    |
| CB     | BP       | 0.89       | 3.73 - 18.98 | <.0001  |
| CB     | MS       | 0.53       | 0.46 - 2.69  | 1.00    |
| CB     | SS       | 0.75       | 1.28 - 7.06  | 0.09    |
| CF     | BP       | 0.66       | 1.13 - 3.36  | 0.11    |
| CF     | MS       | 0.20       | 0.11 - 0.58  | 0.01    |
| CF     | SS       | 0.41       | 0.35 - 1.37  | 0.81    |
| BP     | MS       | 0.12       | 0.05 - 0.32  | 0.00    |
| BP     | SS       | 0.26       | 0.18 - 0.72  | 0.04    |
| MS     | SS       | 0.73       | 1.06 - 6.96  | 0.22    |

**Table S1n.** Evaluation of differences in sulfisoxazole resistance occurring among generic *E. coli* originating from multiple segments of the One Health continuum

| Sample | Variable | Odds ratio | 95% CI       | P-value |
|--------|----------|------------|--------------|---------|
| CB     | CF       | 0.85       | 2.07 - 14.67 | 0.01    |
| CB     | BP       | 0.91       | 3.34 - 27.45 | 0.0005  |
| CB     | MS       | 0.71       | 0.78 - 7.57  | 0.52    |
| CB     | SS       | 0.78       | 1.11 - 11.27 | 0.20    |
| CF     | CF       | 0.63       | 0.87 - 3.45  | 0.49    |
| CF     | CF       | 0.31       | 0.18 - 1.09  | 0.38    |
| CF     | CF       | 0.39       | 0.26 - 1.57  | 0.85    |
| BP     | BP       | 0.20       | 0.10 - 0.66  | 0.04    |
| BP     | BP       | 0.27       | 0.15 - 0.93  | 0.20    |
| MS     | SS       | 0.59       | 2.07 - 14.67 | 0.96    |

**Table S10.** Evaluation of differences in florfenicol resistance occurring among generic *E. coli* originating from multiple segments of the One Health continuum

| <b>Sample</b> | <b>Variable</b> | <b>Odds ratio</b> | <b>95% CI</b> | <b>P-value</b> |
|---------------|-----------------|-------------------|---------------|----------------|
| CB            | CF              | 0.92              | 0.55 - 4.47   | 0.05           |
| CB            | BP              | 0.94              | 0.01 - 0.59   | 0.03           |
| CB            | MS              | 0.43              | 0.01 - 0.82   | 1.00           |
| CB            | SS              | 0.92              | 0.44 - 3.84   | 0.09           |
| CF            | CF              | 0.57              | 0.01 - 0.40   | 0.97           |
| CF            | CF              | 0.06              | 0.00 - 0.55   | 0.15           |
| CF            | CF              | 0.50              | 0.30 - 2.31   | 1.00           |
| BP            | BP              | 0.05              | 0.05 - 10.81  | 0.10           |
| BP            | BP              | 0.43              | 2.02 - 97.54  | 0.98           |
| MS            | SS              | 0.94              | 1.47 - 240.67 | 0.18           |

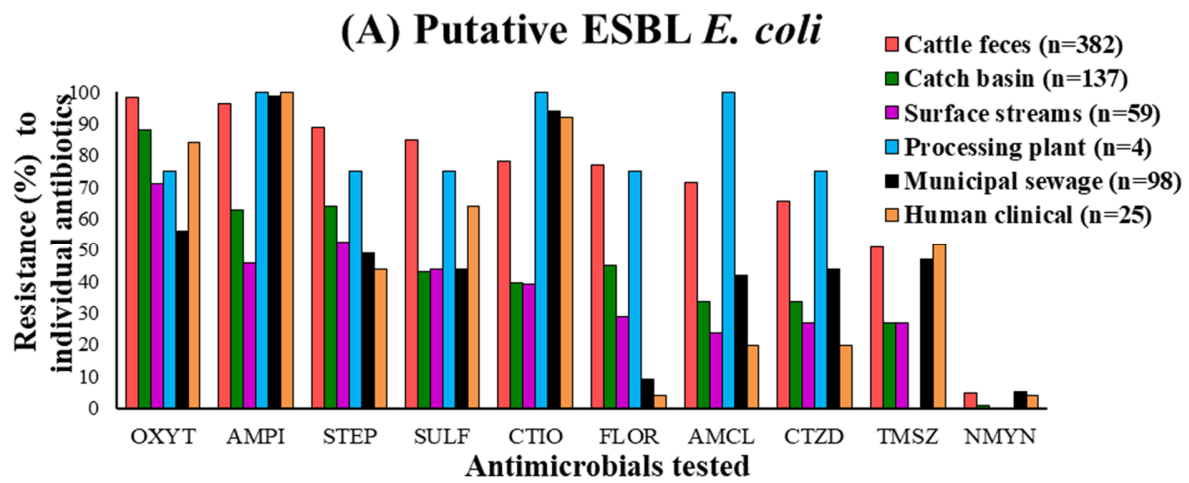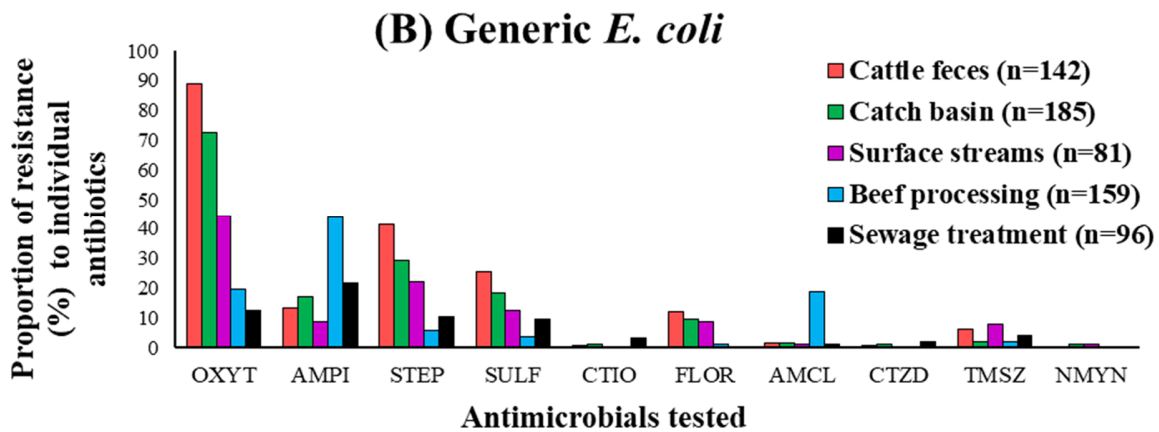

**Figure S1:** Trends of antimicrobial resistance prevalence in (A) extended-spectrum cephalosporin-resistant *E. coli* and (B) generic *E. coli* populations with specificity to sample origin, expressed as percentages. In (A), *E. coli* resistance to individual antibiotics differ across sources ( $P < 0.001$ ), whereas in (B) *E. coli* did not differ across sources ( $P < 0.99$ ), although differences were observed per source\*antibiotic interaction in both populations ( $P < 0.001$ ).

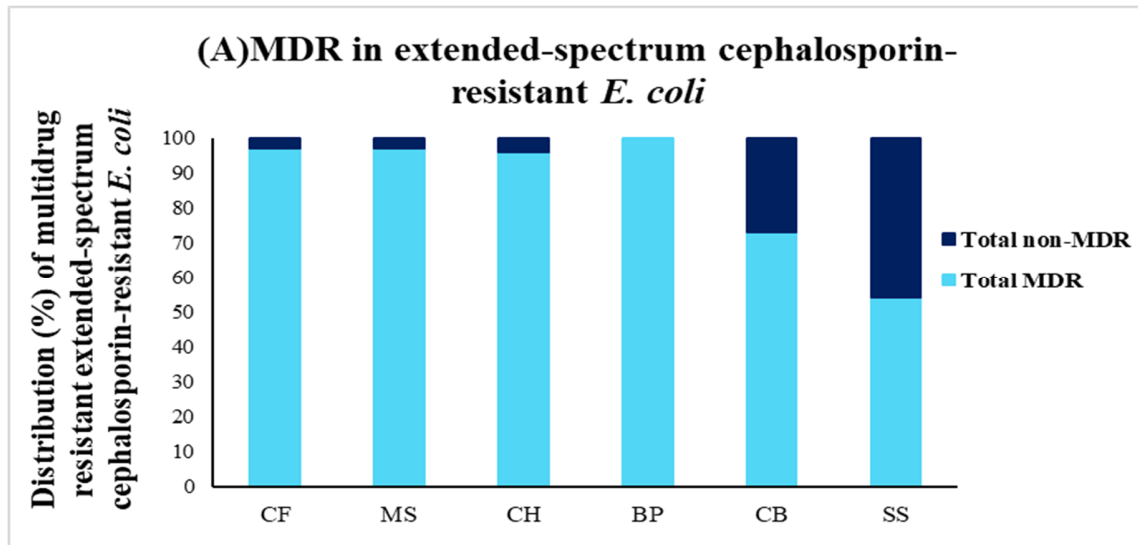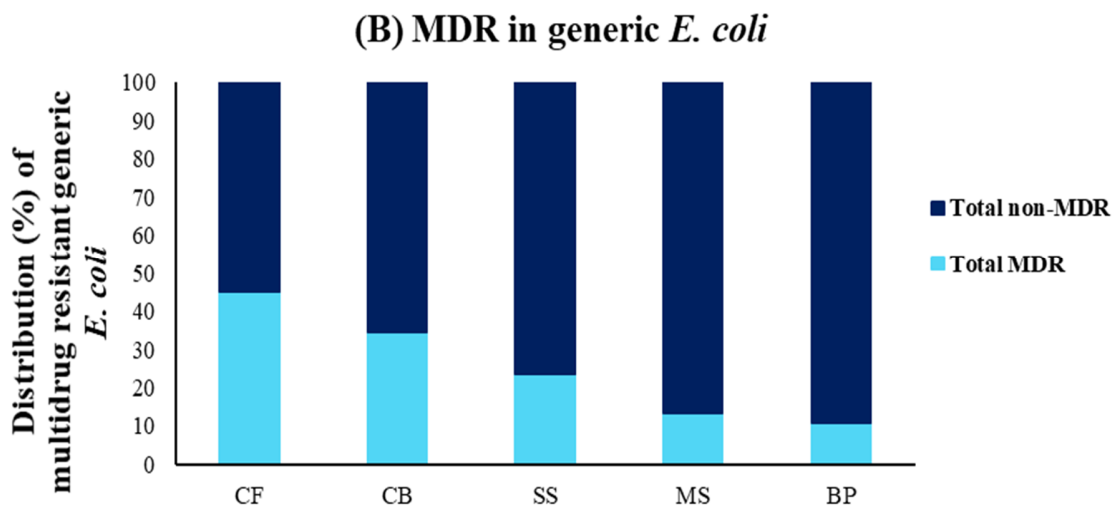

**Figure S2:** Prevalence of total multidrug resistance in (resistance to antibiotics in two classes and above in (A) extended-spectrum cephalosporin-resistant and (B) generic *E. coli* from CF – cattle feces, MS – municipal Sewage, CH – clinical ill humans, BP – beef processing, CB – catch basin, SS – surface streams



**Table S2:** Patterns of antimicrobial resistance in extended-spectrum cephalosporin-resistant *E. coli* showing resistance to six or more tested agents.

| Patterns                                          | Number of antibiotics | Number of isolates (prevalence) | Prevalence (%) |
|---------------------------------------------------|-----------------------|---------------------------------|----------------|
| AMPI-CTZD-AMCL-CTIO-STEP-SULF-FLOR-OXYT-TMSZ-NMYN | 10                    | 5                               | 1.7            |
| AMPI-CTZD-AMCL-CTIO-STEP-SULF-FLOR-OXYT-TMSZ      | 9                     | 123                             | 41.3           |
| AMPI-CTZD-CTIO-STEP-SULF-FLOR-OXYT-TMSZ-NMYN      | 9                     | 4                               | 1.3            |
| AMPI-CMCL-CTZD-CTIO-STEP-SULF-FLOR-OXYT           | 8                     | 105                             | 35.2           |
| AMPI-AMCL-CTZD-CTIO-STEP-SULF-OXYT                | 8                     | 4                               | 1.3            |
| AMPI-AMCL-CTZD-CTIO-STEP-FLOR-OXYT                | 8                     | 1                               | 0.3            |
| AMPI-AMCL-CTZD-STEP-SULF-FLOR-OXYT-TMSZ           | 8                     | 1                               | 0.3            |
| AMPI-CTIO-STEP-SULF-FLOR-OXYT-TMSZ-NMYN           | 7                     | 1                               | 0.3            |
| AMPI-CTIO-AMCL-STEP-SULF-OXYT-TMSZ-NMYN           | 8                     | 5                               | 1.7            |
| AMPI-AMCL-CTIO-STEP-SULF-OXYT                     | 7                     | 3                               | 1.0            |
| AMPI-AMCL-CTZD-STEP-SULF-FLOR-OXYT                | 7                     | 9                               | 3.0            |
| AMPI-AMCL-CTZD-STEP-FLOR-OXYT-TMSZ                | 7                     | 1                               | 0.3            |
| AMPI-CTZD-CTIO-STEP-SULF-OXYT-TMSZ                | 7                     | 5                               | 1.7            |
| AMPI-AMCL-CTZD-STEP-SULF-FLOR-OXYT                | 8                     | 2                               | 0.7            |
| AMPI-CTIO-STEP-SULF-OXYT-TMSZ-NMYN                | 7                     | 2                               | 0.7            |
| AMPI-CTIO-STEP-SULF-OXYT-FLOR-NMYN                | 7                     | 1                               | 0.3            |
| AMPI-CTIO-STEP-SULF-OXYT-FLOR-TMSZ                | 7                     | 9                               | 3.0            |
| AMPI-CTIO-STEP-SULF-OXYT-TMSZ                     | 6                     | 16                              | 5.4            |
| AMPI-CTIO-CTZD-OXYT-FLOR-TMSZ                     | 6                     | 1                               | 0.3            |

Ampicillin - AMPI, amoxicillin/clavulanic acid - AMCL, ceftiofor (ceftiofur) - CTIO, ceftazadime (ceftazidime) - CTZD, streptomycin - STEP, neomycin - NMYN, oxytetracycline - OXYT, florfenicol - FLOR, trimethoprim/sulfamethoxazole - TMSZ, sulfisoxazole - SULF.

Table S3: Multidrug and ESBL phenotype versus  $\beta$ -lactamase and AmpC resistance genotypes in extended-spectrum cephalosporin-resistant *E. coli* isolated from different sources

| <b>Gene/Source</b>                       | <b>CHumans</b> | <b>MSewage</b> | <b>CFeces</b> | <b>CBasins</b> | <b>SStreams</b> | <b>BProcessing</b> |
|------------------------------------------|----------------|----------------|---------------|----------------|-----------------|--------------------|
| ESBL phenotype                           | 64             | 48             | 22.5          | 10.9           | 15.3            | 0                  |
| MDR phenotype                            | 96             | 96.9           | 97.1          | 73             | 54.2            | 100                |
| Total $\beta$ -lactamase gene occurrence | 100            | 80.6           | 35.3          | 27             | 22              | 0                  |
| SHV                                      | 0              | 3.1            | 1.8           | 0              | 0               | 0                  |
| TEM                                      | 48             | 34.7           | 15.4          | 19.7           | 15.3            | 0                  |
| OXA                                      | 28             | 14.3           | 0             | 0              | 0               | 0                  |
| CTXM                                     | 96             | 67.3           | 25.4          | 11.7           | 15.3            | 0                  |
| CTXM-1                                   | 72             | 33.7           | 18.6          | 11.7           | 15.3            | 0                  |
| CTX-M 2                                  | 24             | 19.4           | 5.2           | 0              | 0               | 0                  |
| CTX-M 9                                  | 24             | 28.6           | 5.8           | 0              | 0               | 0                  |
| CMY                                      | 32             | 50             | 87.2          | 91.2           | 93.2            | 50                 |
